# Supplementary material for: Influence of dimensionality on optical properties of doped assembly of gold nanoclusters
Source: Royal Society of Chemistry journal article supplement (doi:10.1039/d4tc00123k), 2024-01-01
Supplement: d4tc00123k1.pdf [file d4tc00123k1.pdf]

# **Influence of dimensionality on optical properties of doped assembly of gold nanoclusters**

## Supporting Information

Santanu Dolai<sup>a</sup>, Srestha Basu<sup>\*b</sup>, Anumita Paul<sup>\*a</sup>.

<sup>a</sup>Department of Chemistry, Indian Institute of Technology Guwahati,  
Guwahati, Assam – 781039, India.

\*E-mail: [anumita@iitg.ac.in](mailto:anumita@iitg.ac.in)

<sup>b</sup>Schulich Faculty of Chemistry, Technion-Israel Institute of Technology, Haifa 3200003,  
Israel

\*Email: [srestha.basu@campus.technion.ac.il](mailto:srestha.basu@campus.technion.ac.il)

# Contents

|                                                                                                                                                                         |    |
|-------------------------------------------------------------------------------------------------------------------------------------------------------------------------|----|
| <b>Fig. S1</b> Characterisation figures of as synthesized Au NCs .....                                                                                                  | 3  |
| <b>Fig. S2</b> Digital images of the reaction mixture at different stages of Mn doped Zn Au NCs under daylight and UV lamp .....                                        | 3  |
| <b>Fig. S3</b> Photoluminescent emission and excitation spectra of Mn doped Zn Au NCs at different times during synthesis .....                                         | 4  |
| <b>Fig. S4</b> Characterization figures of as synthesized Zn Au NCs .....                                                                                               | 4  |
| <b>Fig. S5</b> UV-vis spectra of Mn doped Zn Au NCs at different times during synthesis .....                                                                           | 4  |
| <b>Fig. S6</b> Excitation spectra ( $\lambda_{em} = 565$ to $595$ nm) and UV-vis spectra of Mn doped Zn Au NCs at 2 hours for different Zn : Mn (W/W in mg) ratio ..... | 5  |
| <b>Fig. S7</b> Excitation spectra ( $\lambda_{em} = 492$ to $465$ nm) of Mn-doped Zn Au NCs at 2 hours for different Zn:Mn (W/W in mg) ratio .....                      | 5  |
| <b>Fig. S8</b> Emission spectra of Mn doped Zn Au NCs with different Zn : Mn (W/W in mg) ratio .....                                                                    | 6  |
| <b>Fig. S9</b> Photoluminescence spectra of control experiments on Au NCs .....                                                                                         | 6  |
| <b>Fig. S10</b> Photoluminescence spectra of control experiment on Zn Au NCs .....                                                                                      | 7  |
| <b>Fig. S11</b> Photoluminescence spectrum of Mn doped Zn Au NCs post synthetic treatment with zinc acetate .....                                                       | 7  |
| <b>Fig. S12</b> Time resolve photoluminescence spectrum of Mn doped Zn Au NCs at different wavelengths and at different synthesis time .....                            | 8  |
| <b>Fig. S13</b> TEM image and size distribution of Mn doped Zn Au NCs formed with different Zn:Mn (W/W in mg) ratio .....                                               | 9  |
| <b>Table S1</b> Elemental analysis from XPS at different reaction times for different Zn : Mn (W/W) ratio .....                                                         | 10 |
| <b>Fig. S14</b> TEM image and elemental mapping of Mn doped Zn Au NCs .....                                                                                             | 10 |
| <b>Fig. S15</b> XPS spectrum of Mn doped Zn Au NCs .....                                                                                                                | 11 |
| <b>Fig. S16</b> XRD spectra of Mn- doped Zn Au NCs .....                                                                                                                | 12 |
| <b>Fig. S17</b> FTIR spectra of Zn Au NCs and Mn doped Zn Au NCs .....                                                                                                  | 12 |
| <b>Fig. S18</b> EPR spectrum of Mn doped Zn Au NCs with different Zn : Mn (W/W in mg) ratio .....                                                                       | 13 |

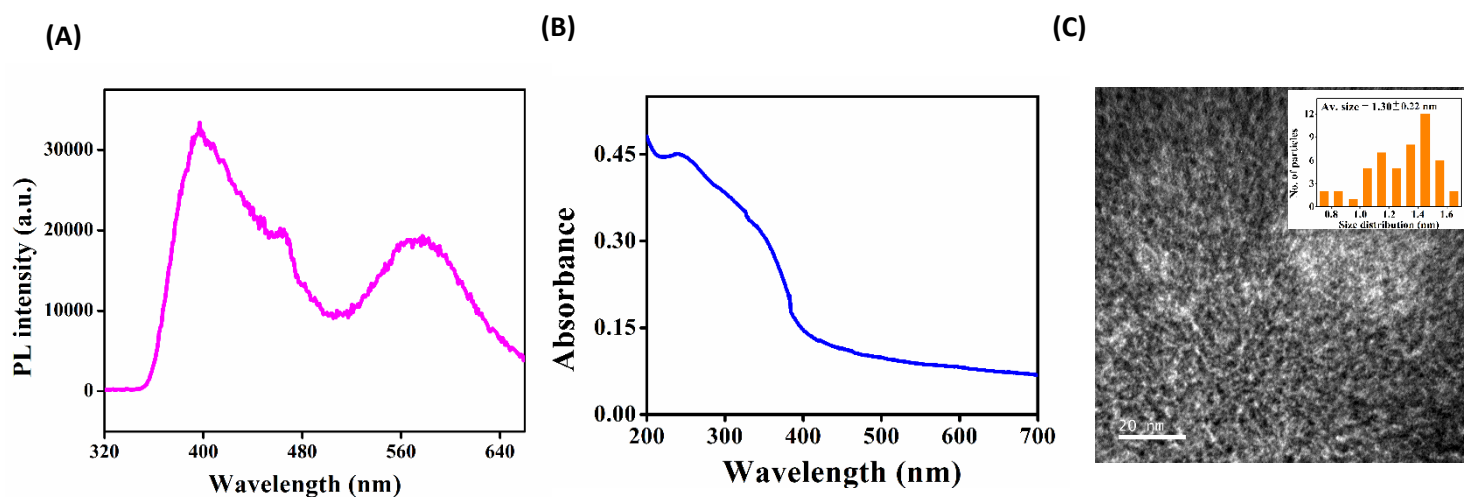

**Fig. S1** (A) Emission spectrum of Au NCs upon excitation at 300nm. (B) UV-vis spectrum of Au NCs. (C) TEM image of Au NCs. Inset: particle size distribution in TEM image (C)

**Under daylight:**

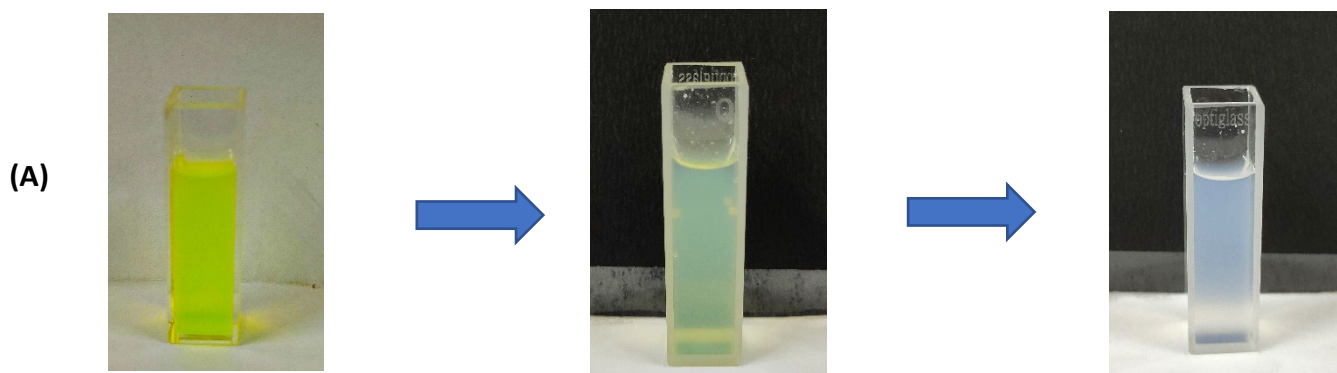

**Under UV light(365nm):**

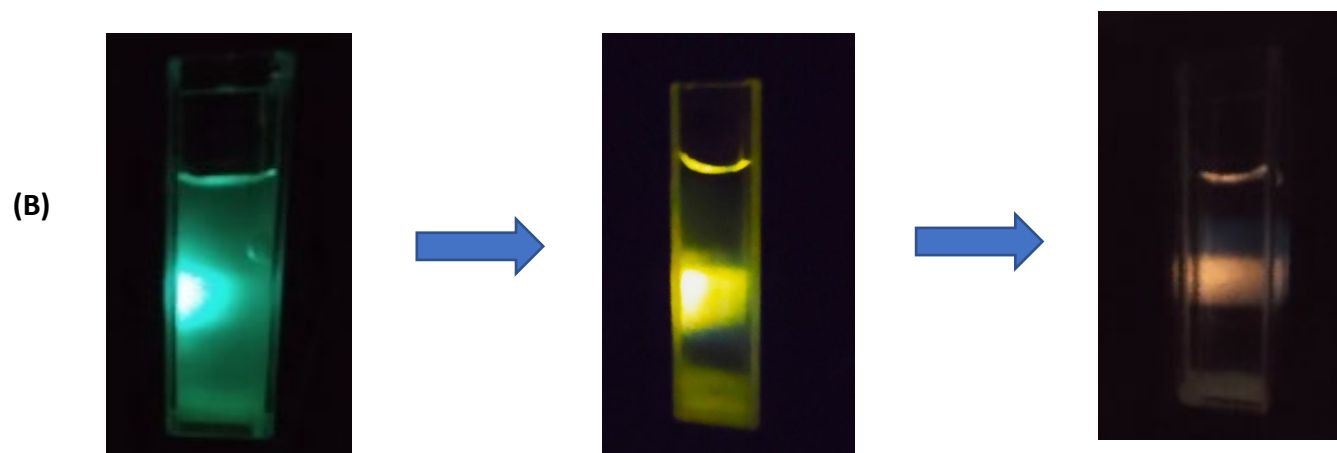

**Fig. S2** Digital images of the reaction mixture at different stages. Reaction initiated after zinc acetate dihydrate & manganese acetate dihydrate were added to a solution of Au NCs - (A) under daylight and (B) under UV lamp.

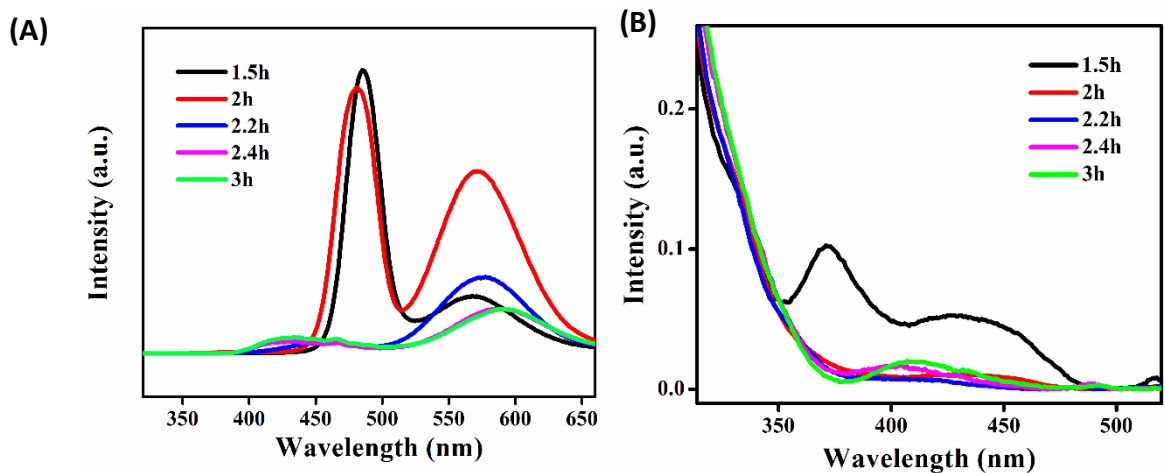

**Fig. S3** (A) Emission ( $\lambda_{\text{excitation}} = 300 \text{ nm}$ ) & (B) excitation spectra ( $\lambda_{\text{emission}} = 565 \text{ to } 595 \text{ nm}$ ) of Mn doped Zn Au NCs (Zn : Mn = 200 : 0.5(W/W in mg) at different reaction time.

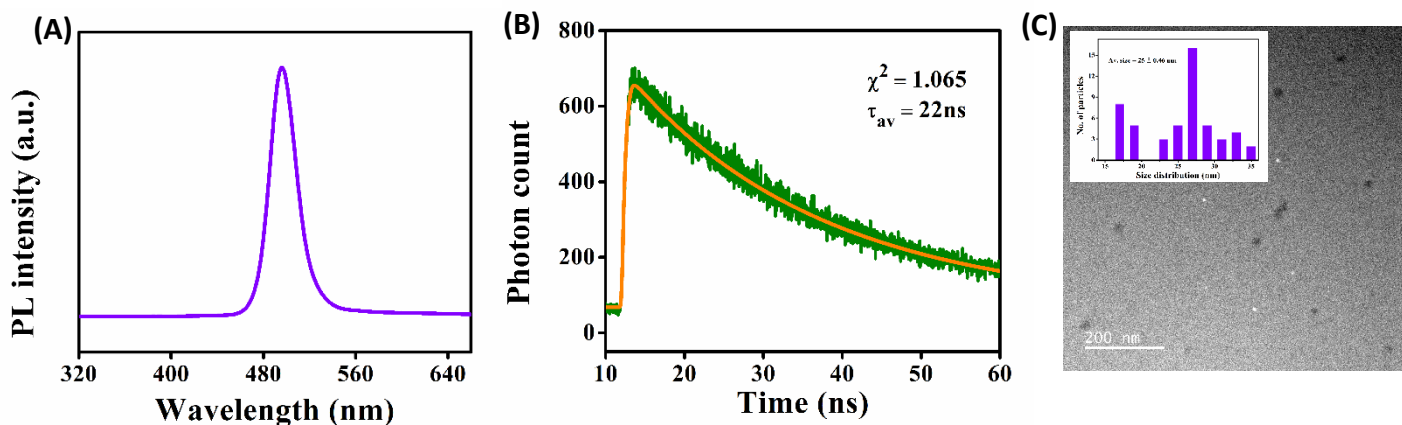

**Fig. S4** (A) Emission spectrum of Zn Au NCs upon excitation at 300 nm. (B) Time resolved photoluminescence decay curve of Zn Au NCs. (C) TEM image of Zn Au NCs. Inset: particle size distribution in TEM image (C)

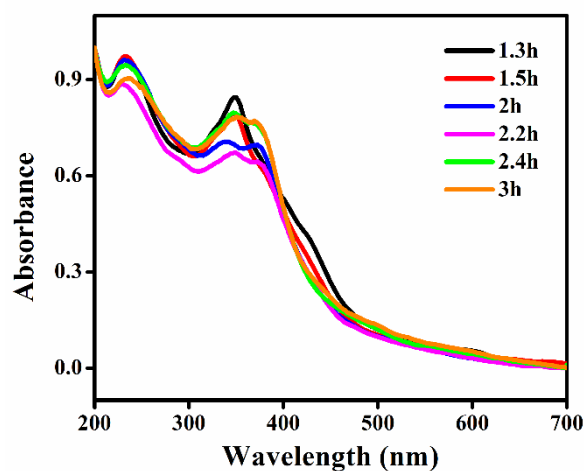

**Fig. S5** UV-vis spectra of Mn<sup>2+</sup> doped Zn Au NCs weight ratio of Zn:Mn = 200:0.5 at different reaction times.

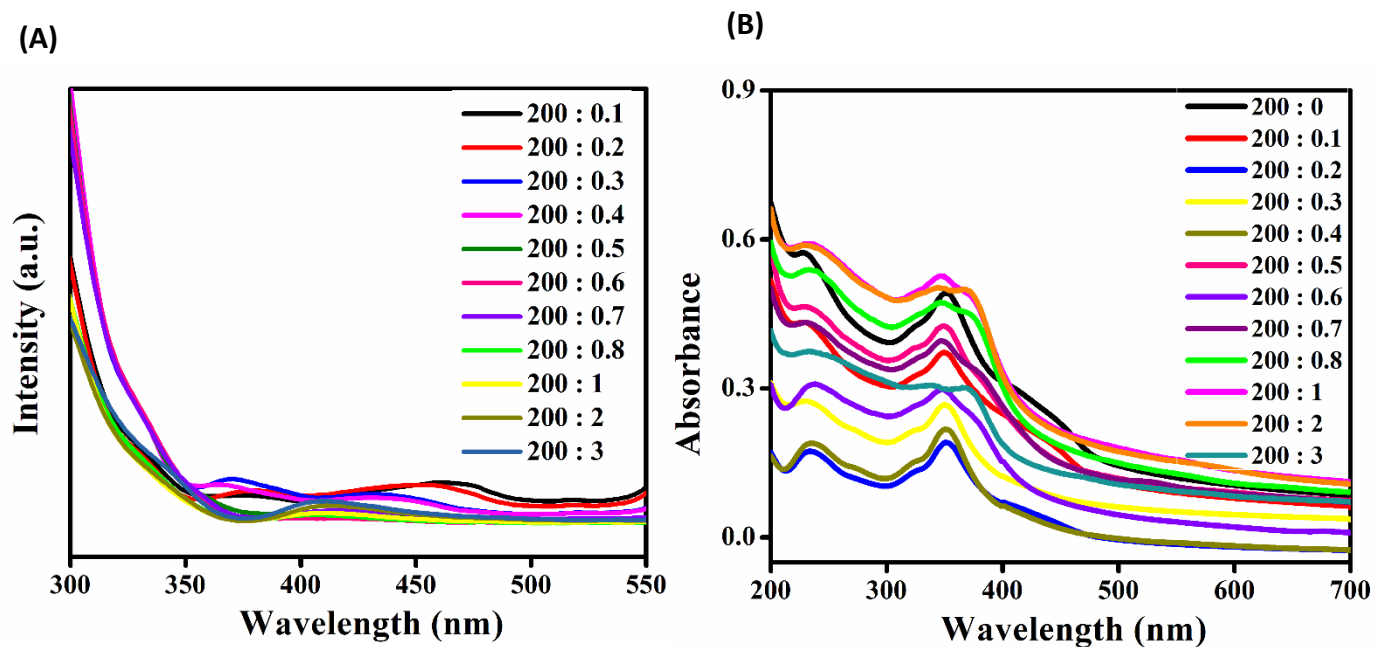

**Fig. S6 (A)** Excitation spectra ( $\lambda_{\text{emission}} = 565$  to  $595$  nm) of Mn<sup>2+</sup> doped Zn Au NCs after two hours of reaction with different Zn : Mn (W/W in mg) ratio. **(B)** UV-vis spectra of Mn<sup>2+</sup> doped Zn Au NCs after two hours of reaction with different Zn : Mn (W/W in mg) ratio.

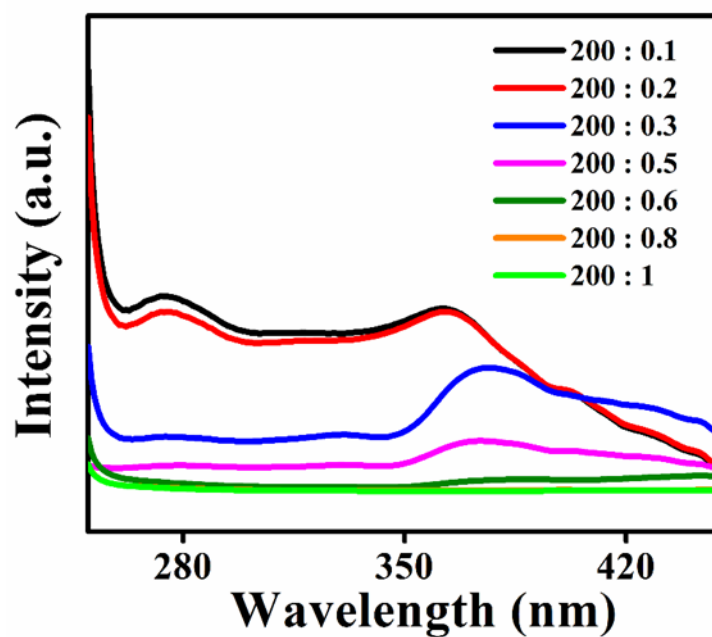

**Fig. S7** Excitation spectra ( $\lambda_{\text{emission}} = 492$  to  $465$  nm) of Mn<sup>2+</sup> doped Zn Au NCs at different Zn:Mn (W/W in mg) ratios after 2hrs.

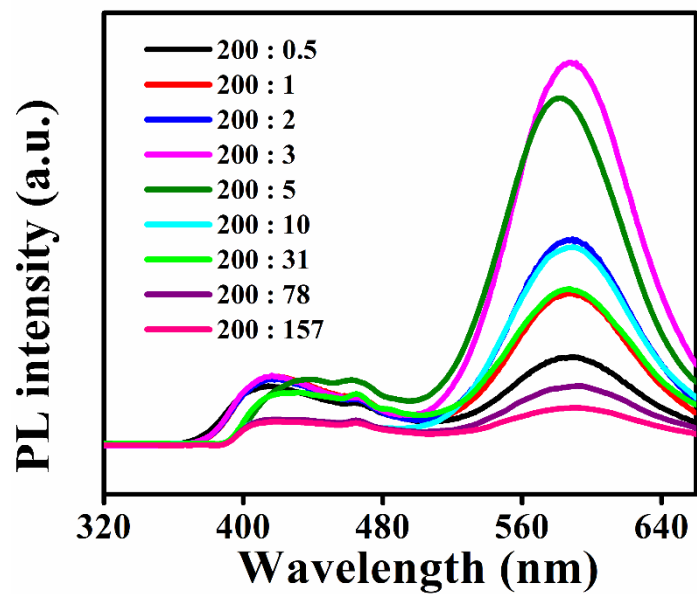

**Fig. S8** Emission spectra of  $Mn^{2+}$  doped Zn Au NCs at completion of reaction with varying Zn : Mn (W/W in mg) ratio. Excitation at 300nm.

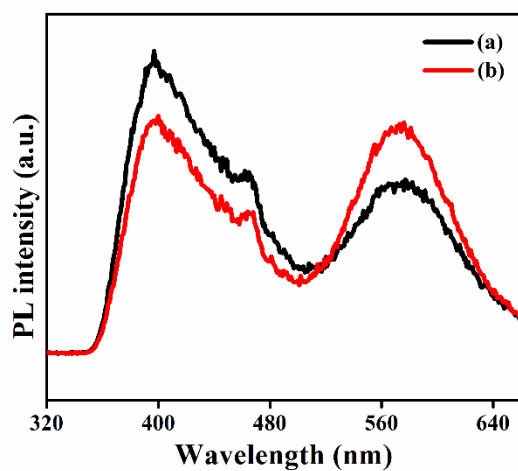

**Fig. S9** Emission spectra of (a) Au NCs & (b) after addition of Mn- acetate, exciting at 300nm.

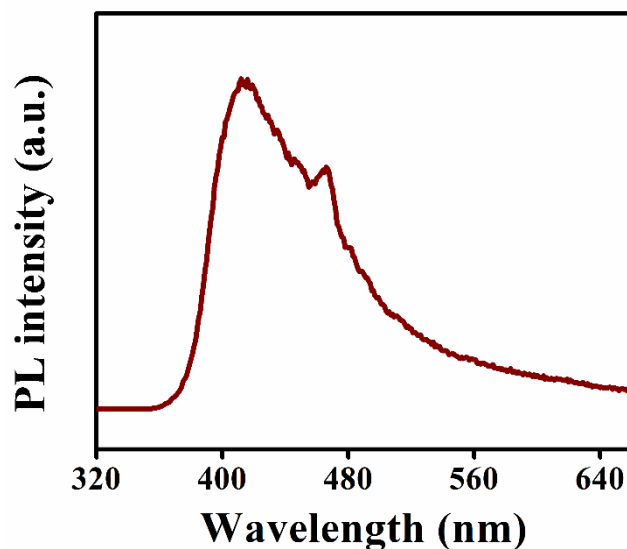

**Fig. S10** Emission spectra of Zn Au NCs after addition of Mn- acetate exciting at 300nm.

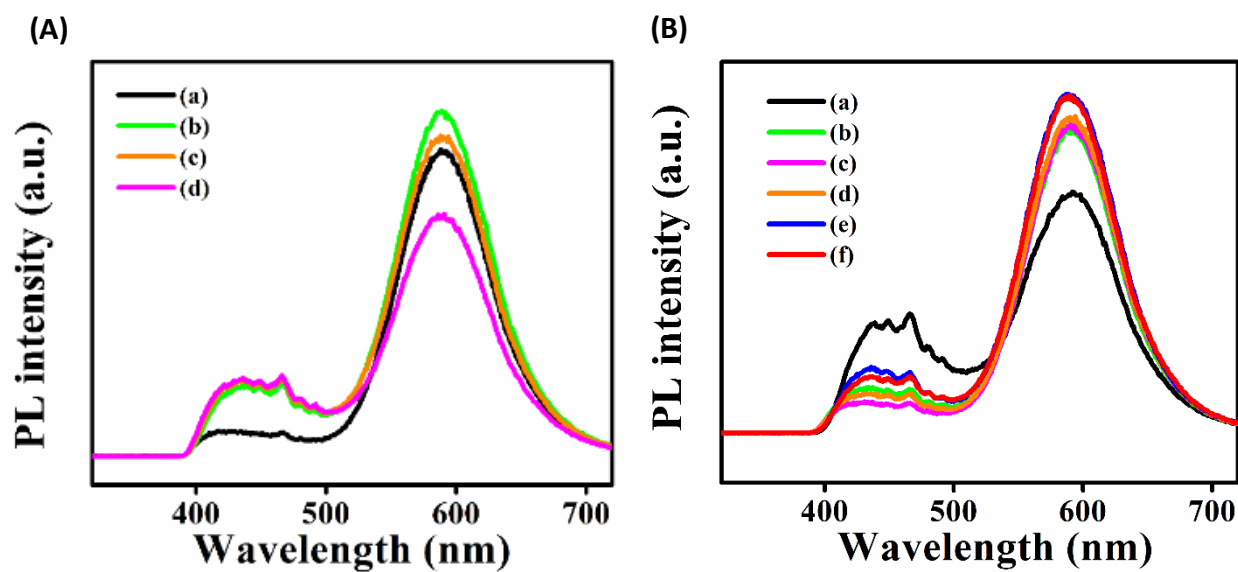

**Fig. S11** Emission spectra of (A) Mn doped Zn Au NCs (exciting at 300 nm) after addition of 13 mM Zn acetate at (a) 0 min, (b) 20min, (c) 4h, (d) 20h. (B) Mn doped Zn Au NCs (exciting at 300 nm) after addition of (a) 0 mM, (b) 1.23 mM (c) 2.38 mM (d) 3.44 mM (e) 5.55 mM (f) 7.44 mM zinc acetate.

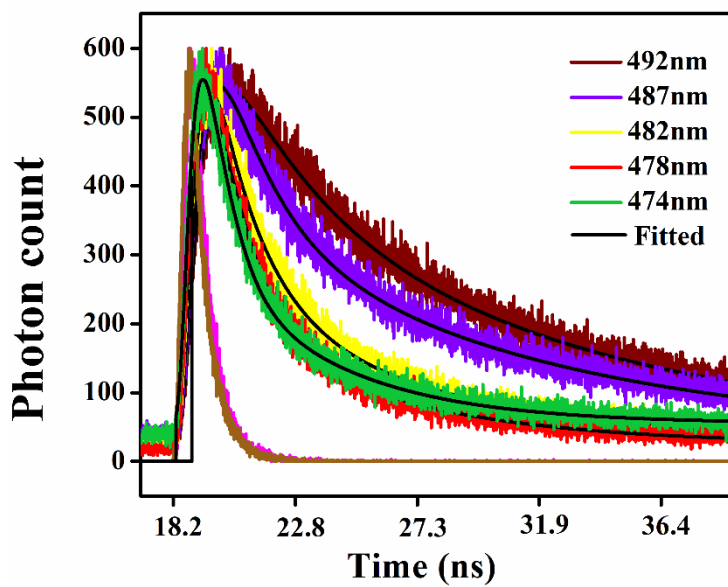

**Fig. S12** Time resolve photoluminescence spectrum of Mn doped Zn Au NCs with Zn : Mn(W/W in mg)= 200 : 0.5 emitting at different wavelength with time respectively.



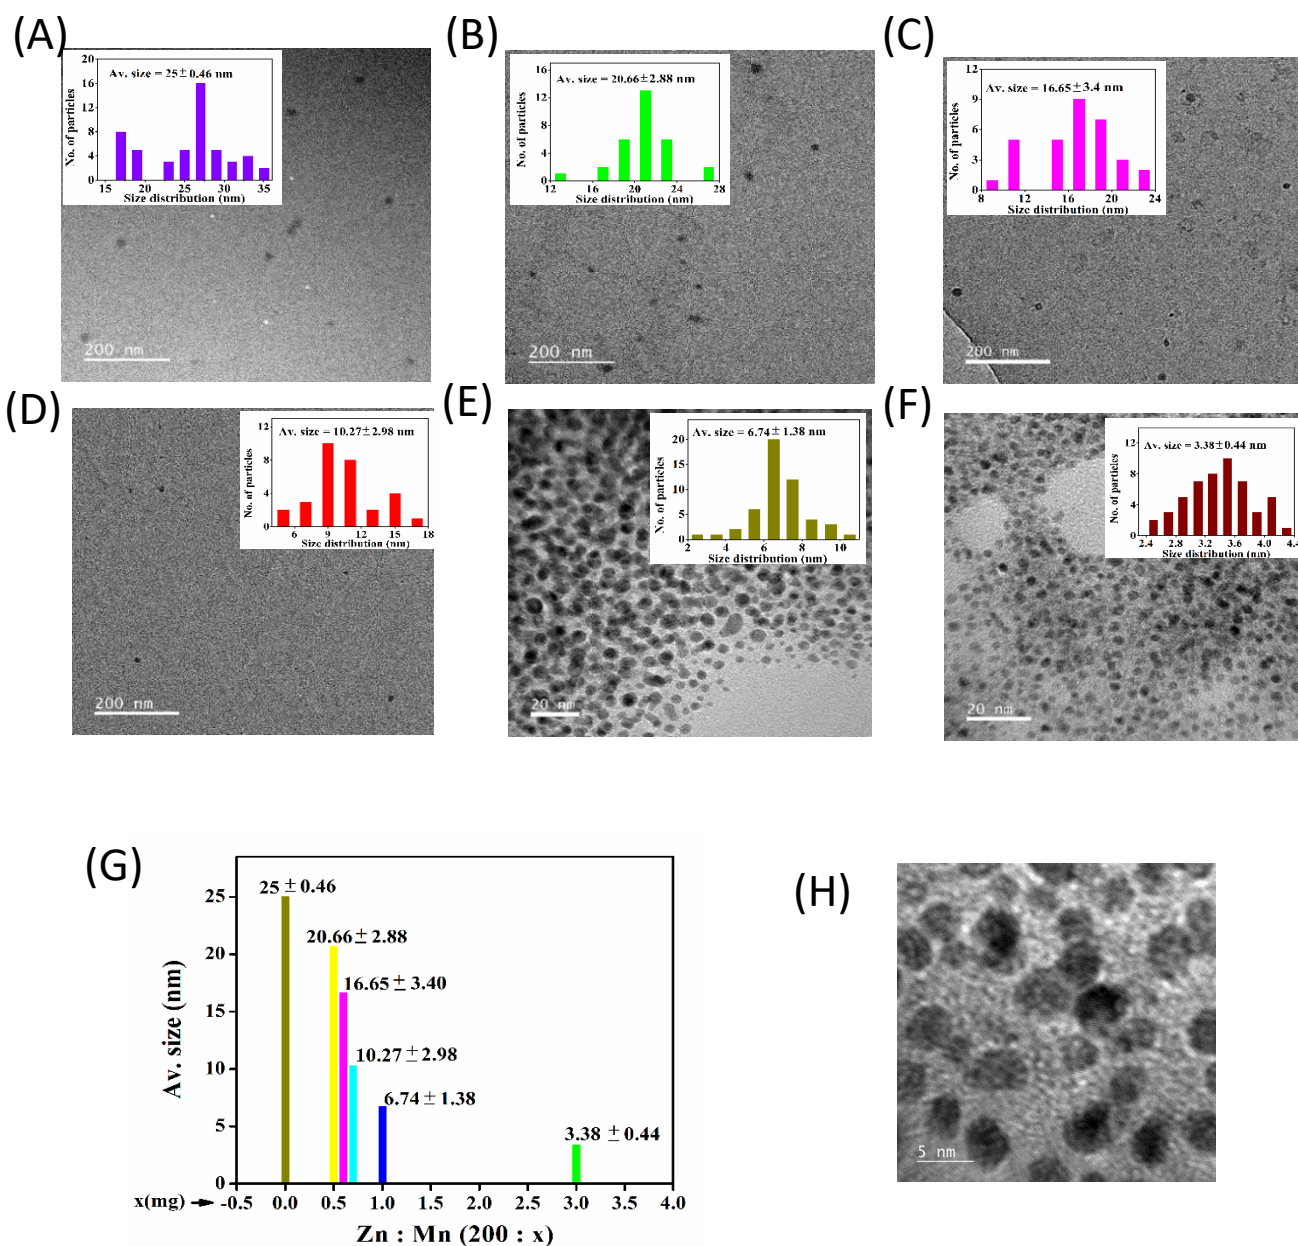

**Fig. S13** TEM image with size distribution (inset) of Mn<sup>2+</sup> doped Zn Au NCs after two hours of reaction with Zn:Mn (w/w in mg) ratio (A) 200:0, (B) 200:0.5, (C) 200:0.6, (D) 200:0.7, (E) 200 : 1, (F) 200:3. (G) Corresponding plot of average size of Mn<sup>2+</sup> doped Zn Au NCs assembly as function of Zn:Mn ratio in reaction mixture. (H) HRTEM image of Mn<sup>2+</sup> doped Zn Au NCs after two hours of reaction with Zn:Mn (w/w in mg) ratio 200:2.

**Table S1** Elemental analysis from XPS at 2hrs & 4hrs of reaction with different Zn : Mn (W/W) ratio.

| Compound (Zn : Mn) | % of Mn | % of Zn | % of Au | Atomic ratio Mn : Zn : Au | Reaction time (hrs) |
|--------------------|---------|---------|---------|---------------------------|---------------------|
| 200 : 0.5          | 1.42    | 59.24   | 39.33   | 1 : 42 : 28               | 2                   |
| 200 : 0.5          | 6.51    | 43.44   | 50.03   | 1 : 7 : 8                 | 4                   |
| 200 : 1            | 6.78    | 40.82   | 52.39   | 1 : 6 : 8                 | 4                   |
| 200 : 3            | 11.64   | 55.76   | 32.60   | 1 : 5 : 3                 | 4                   |

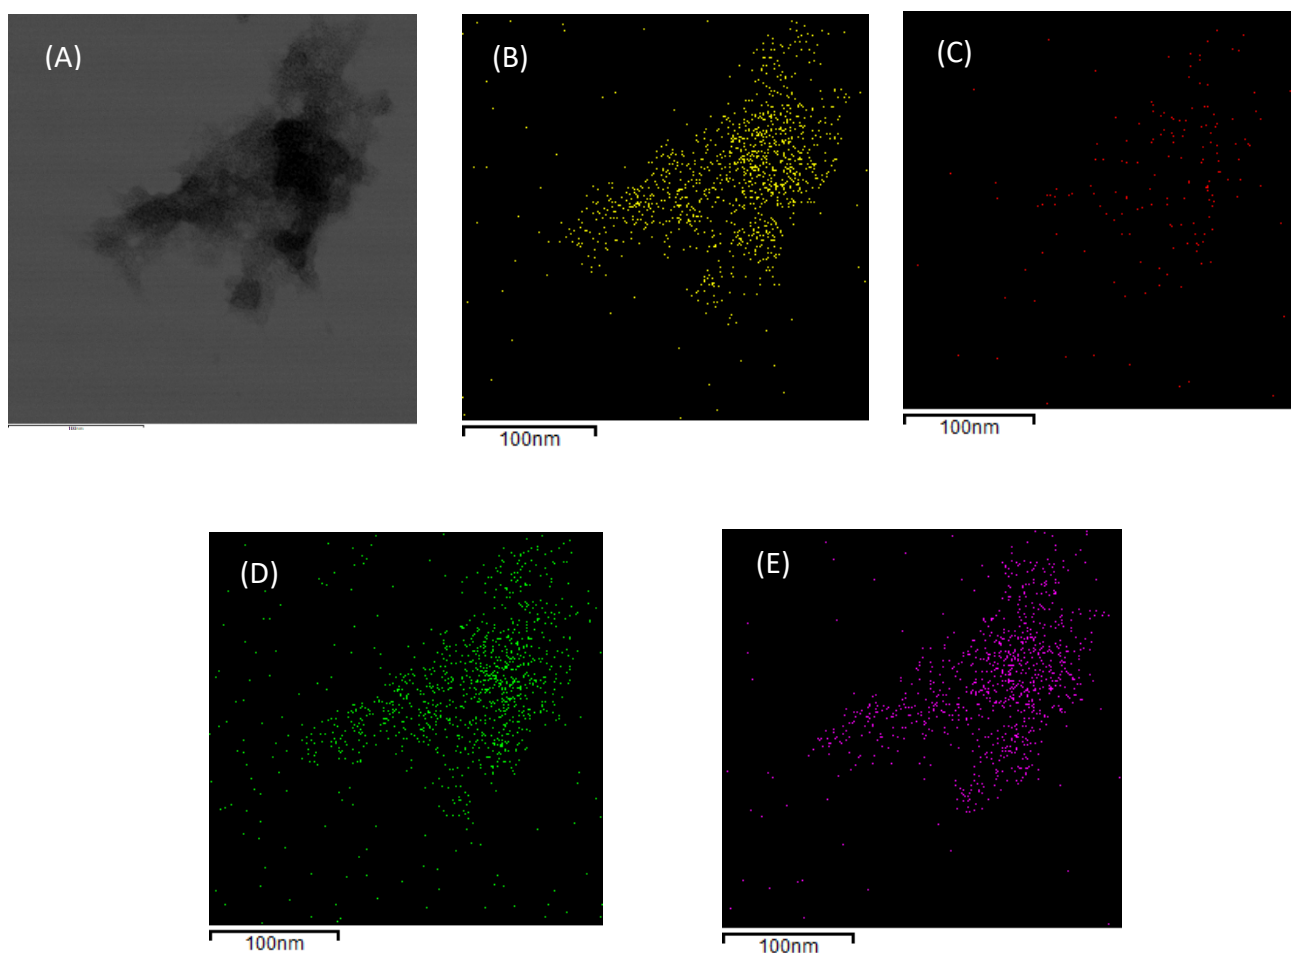

**Fig. S14** (A) TEM image of Mn doped Zn Au NCs. Elemental mapping of (B) Au, (C) Mn and (D) Zn, (E) S in Mn doped Zn Au NCs. The scale bars in all the images are 100 nm.

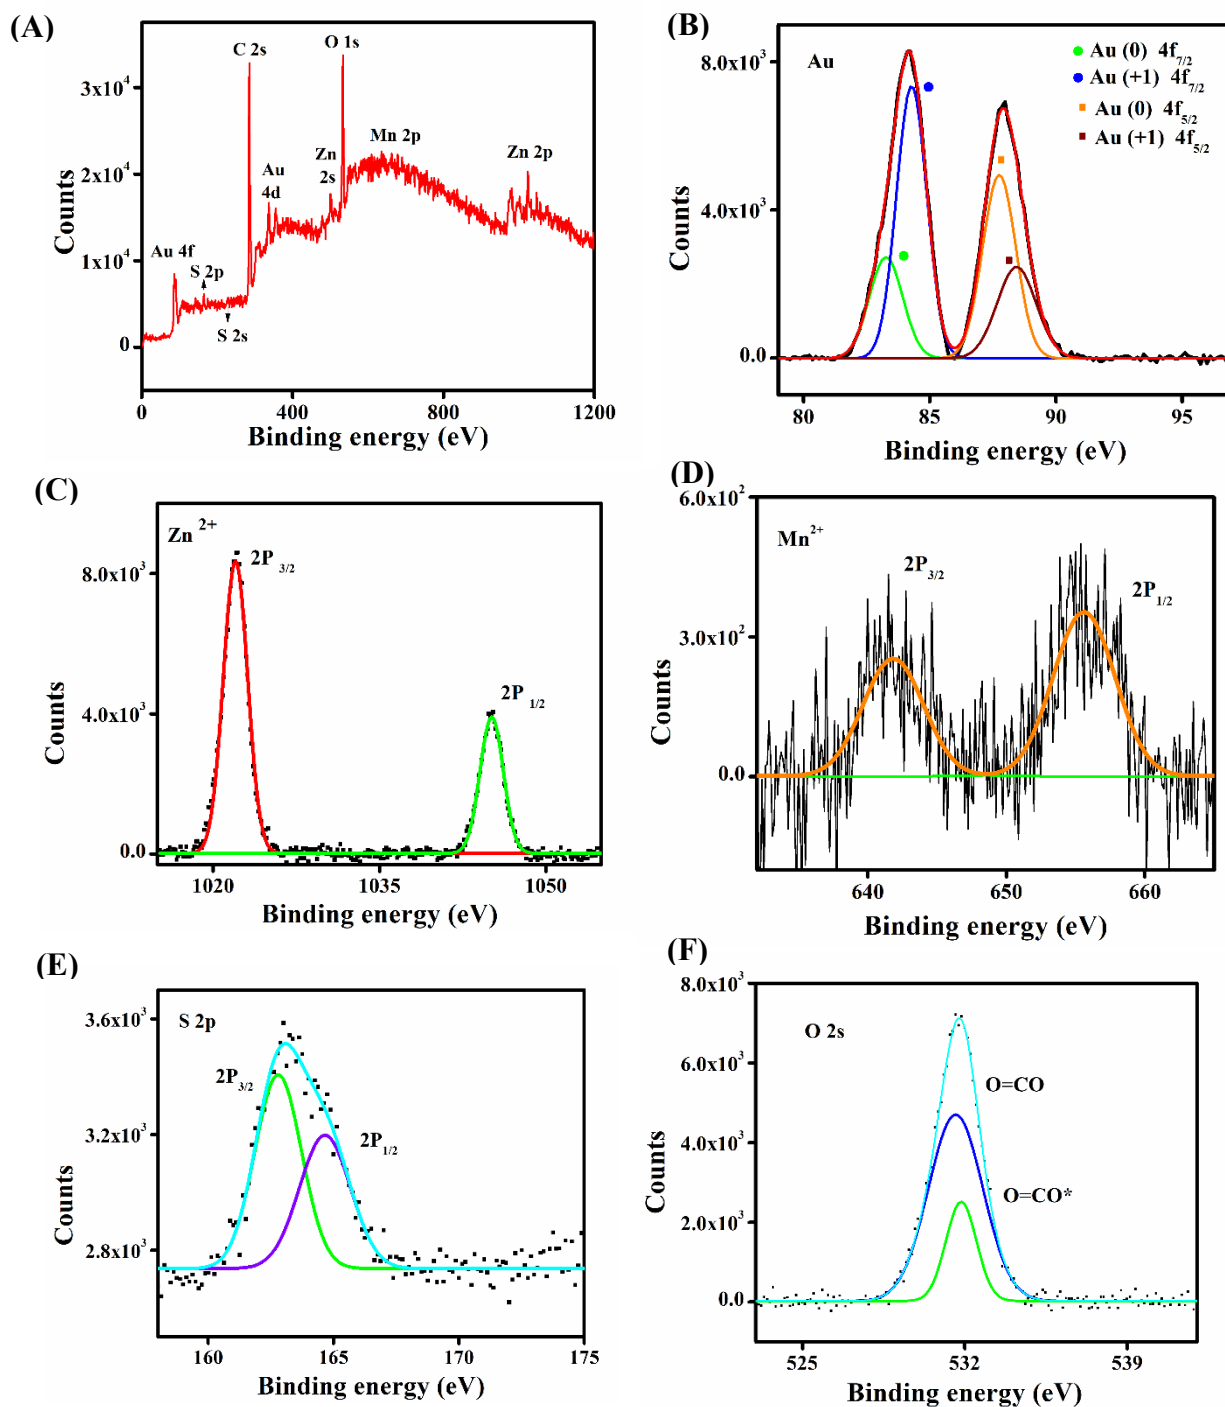

**Fig. S15** (A): Survey XPS spectrum of Mn<sup>2+</sup> doped Zn Au NCs. (B) XPS spectrum of Au element in Mn<sup>2+</sup> doped Zn Au NCs. (C) XPS spectrum of Zn element in Mn<sup>2+</sup> doped Zn Au NCs. (D) XPS spectrum of Mn element in Mn<sup>2+</sup> doped Zn Au NCs. (E) XPS spectrum of S element in Mn<sup>2+</sup> doped Zn Au NCs. (F) XPS spectrum of O element in Mn<sup>2+</sup> doped Zn Au NCs.

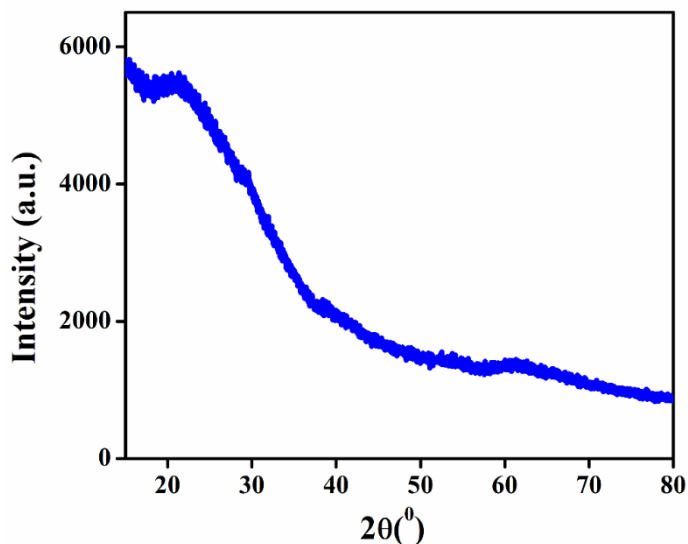

Fig. S16 XRD spectra of  $Mn^{2+}$  doped Zn Au NCs.

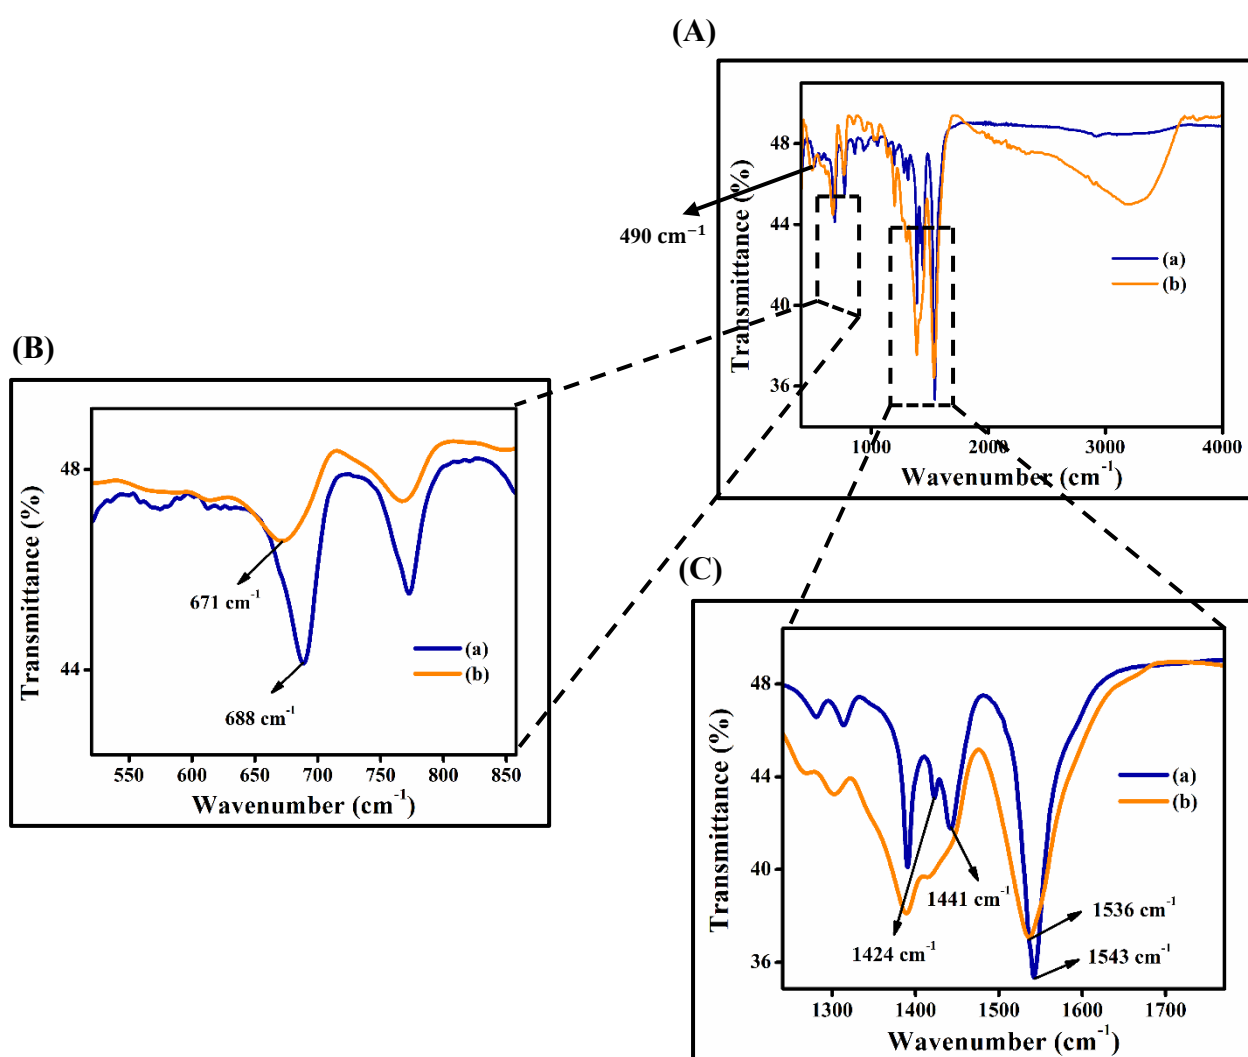

Fig. S17 (A) FTIR spectra of (a) Zn Au NCs and (b)  $Mn^{2+}$  doped Zn Au NCs. (B) Zoomed FTIR spectra corresponding to (A) showing peaks between 600 to 800  $cm^{-1}$  (C) Zoomed FTIR spectra corresponding to (A) showing peaks between 1200 to 1560  $cm^{-1}$ .

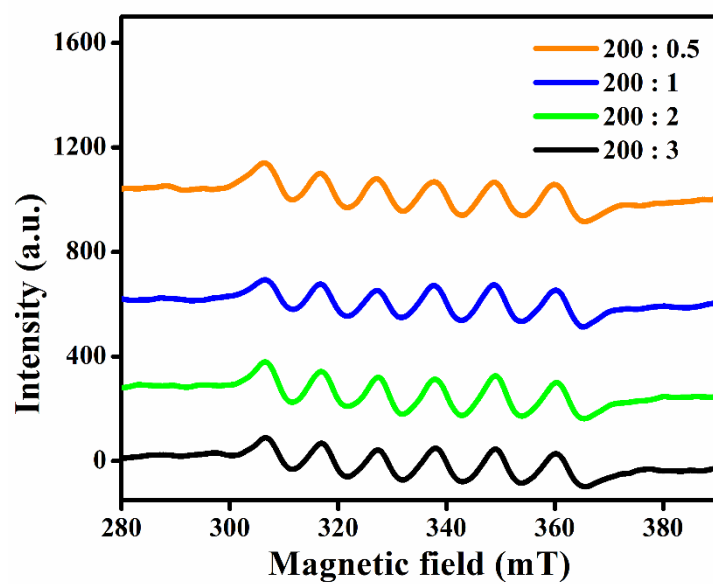

**Fig. S18** EPR spectrum of Mn<sup>2+</sup> doped Zn Au NCs with different Zn : Mn (W/W in mg) at 4hrs.
